# Supplementary material for: Effect of Nurse-Based Management of Hypertension in Rural Western Kenya
Source: PubMed Central journal article supplement (PMC7716784; doi:10.5334/gh.856), 2020-12-01

S1. Supplemental Figure. Loess plot of mean DBP over time, demonstrating early reduction in DBP in both the nurse and clinical officer groups, maintained during the follow-up period.

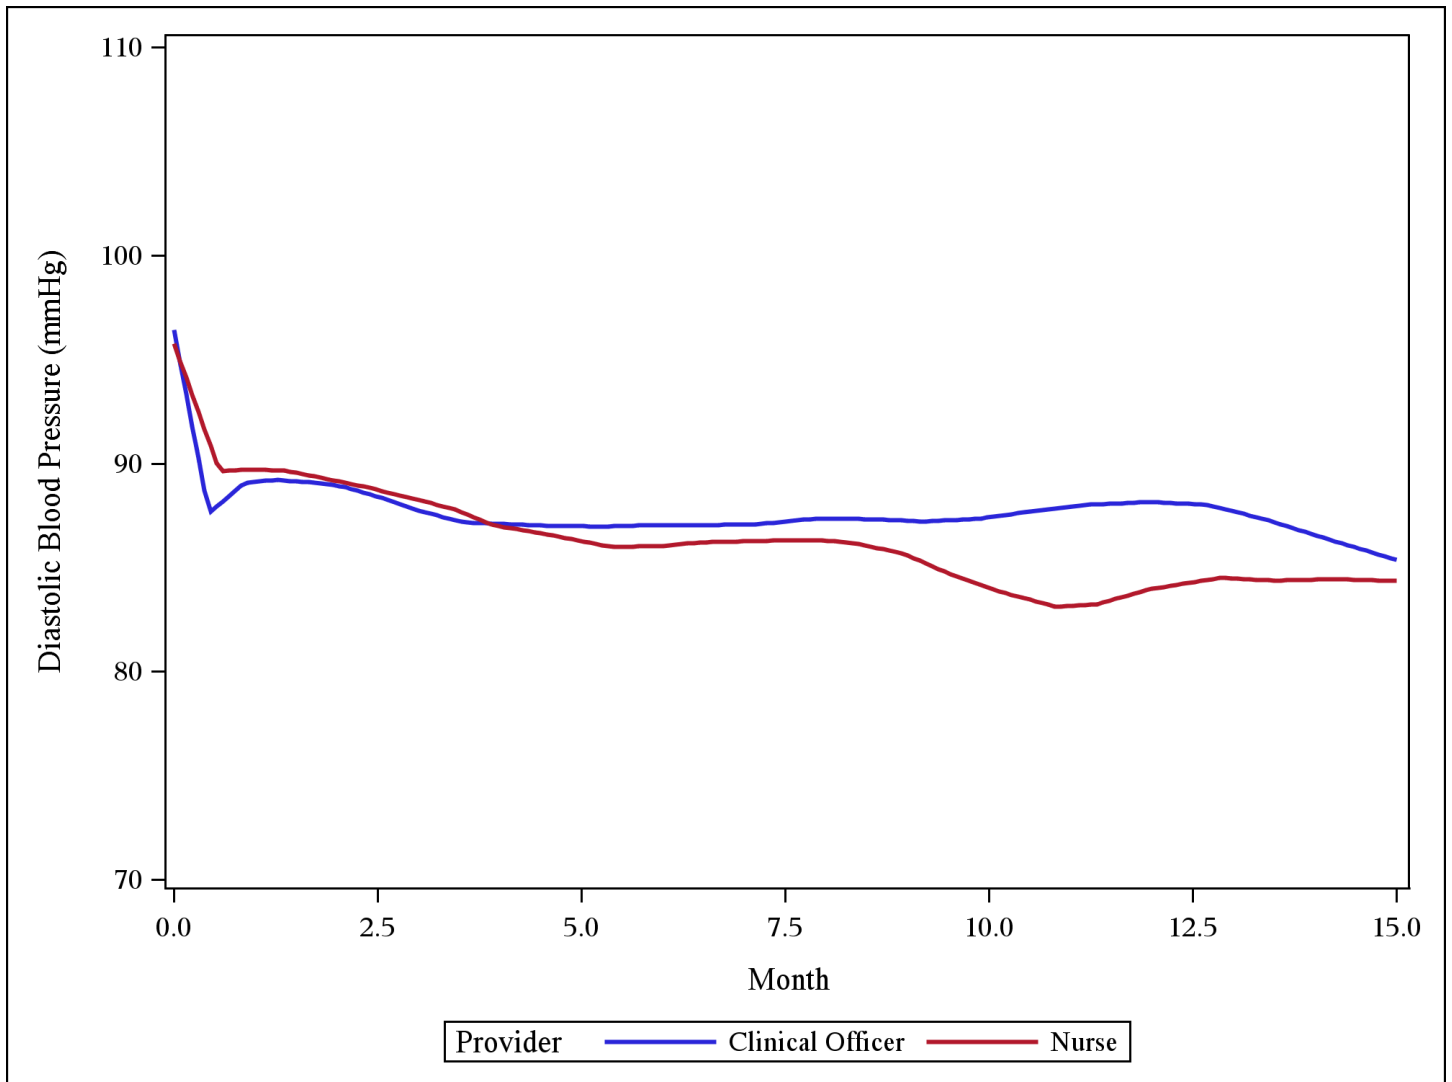

Supplement: gh-15-1-856-s1.pdf [file gh-15-1-856-s1.pdf]
