# Supplementary material for: Effect of Nurse-Based Management of Hypertension in Rural Western Kenya
Source: PubMed Central journal article supplement (PMC7716784; doi:10.5334/gh.856), 2020-12-01
Supplement: gh-15-1-856-s2.pdf [file gh-15-1-856-s2.pdf]

S2. Supplemental Table 1. Slope of change in diastolic blood pressure, before and after three months after initiating care.

|                                                      | <b>Estimate (95% CI)</b> | <b>P Value</b> |
|------------------------------------------------------|--------------------------|----------------|
| <b>Slope before 3 months</b>                         |                          |                |
| Nurse                                                | -2.37 (-3.24 to -1.50)   | <.0001         |
| Clinical Officer                                     | -2.45 (-2.83 to -2.07)   | <.0001         |
| Nurse - Clinical Officer                             | 0.08 (-0.87 to 1.02)     | 0.8748         |
| <b>Slope after 3 months</b>                          |                          |                |
| Nurse                                                | -0.28 (-0.58 to 0.01)    | 0.0596         |
| Clinical Officer                                     | 0.07 (-0.06 to 0.20)     | 0.2774         |
| Nurse - Clinical Officer                             | -0.35 (-0.67 to -0.03)   | 0.0307         |
| <b>Change in slope from before to after 3 months</b> |                          |                |
| Nurse                                                | 2.09 (1.01 to 3.16)      | <.0001         |
| Clinical Officer                                     | 2.52 (2.06 to 2.98)      | <.0001         |
| Nurse - Clinical Officer                             | -0.43 (-1.60 to 0.74)    | 0.4714         |

Model parameter estimates based on piecewise linear mixed-effect models with random intercept and slopes and a knot placed at 3 months, adjusted by age, sex, and healthcare center.
