# Supplementary material for: Effect of Nurse-Based Management of Hypertension in Rural Western Kenya
Source: PubMed Central journal article supplement (PMC7716784; doi:10.5334/gh.856), 2020-12-01
Supplement: gh-15-1-856-s3.pdf [file gh-15-1-856-s3.pdf]

S3. Supplemental Table 2. Systolic Blood Pressure among Patients with Multiple Visits

|                                                      | <b>Estimate (95% CI)</b> | <b>P Value</b> |
|------------------------------------------------------|--------------------------|----------------|
| <b>Slope before 3 months</b>                         |                          |                |
| Nurse                                                | -4.84 (-6.50 to -3.18)   | <.0001         |
| Clinical Officer                                     | -5.08 (-5.82 to -4.33)   | <.0001         |
| Nurse - Clinical Officer                             | 0.24 (-1.58 to 2.05)     | 0.7976         |
| <b>Slope after 3 months</b>                          |                          |                |
| Nurse                                                | -0.44 (-0.98 to 0.09)    | 0.1059         |
| Clinical Officer                                     | 0.16 (-0.07 to 0.39)     | 0.1802         |
| Nurse - Clinical Officer                             | -0.60 (-1.18 to -0.02)   | 0.0433         |
| <b>Change in slope from before to after 3 months</b> |                          |                |
| Nurse                                                | 4.40 (2.37 to 6.43)      | <.0001         |
| Clinical Officer                                     | 5.24 (4.34 to 6.13)      | <.0001         |
| Nurse - Clinical Officer                             | -0.84 (-3.05 to 1.38)    | 0.4578         |

Model parameter estimates based on piecewise linear mixed-effect models with random intercept and slopes and a knot placed at 3 months
