# Supplementary material for: Effect of Nurse-Based Management of Hypertension in Rural Western Kenya
Source: PubMed Central journal article supplement (PMC7716784; doi:10.5334/gh.856), 2020-12-01
Supplement: gh-15-1-856-s4.pdf [file gh-15-1-856-s4.pdf]

S4. Supplemental Table 3. Diastolic Blood Pressure among Patients with Multiple Visits

|                                                      | <b>Estimate (95% CI)</b> | <b>P Value</b> |
|------------------------------------------------------|--------------------------|----------------|
| <b>Slope before 3 months</b>                         |                          |                |
| Nurse                                                | -2.33 (-3.23 to -1.44)   | <.0001         |
| Clinical Officer                                     | -2.31 (-2.71 to -1.92)   | <.0001         |
| Nurse - Clinical Officer                             | -0.02 (-1.00 to 0.96)    | 0.9690         |
| <b>Slope after 3 months</b>                          |                          |                |
| Nurse                                                | -0.28 (-0.58 to 0.01)    | 0.0593         |
| Clinical Officer                                     | 0.07 (-0.06 to 0.19)     | 0.3017         |
| Nurse - Clinical Officer                             | -0.35 (-0.67 to -0.03)   | 0.0323         |
| <b>Change in slope from before to after 3 months</b> |                          |                |
| Nurse                                                | 2.05 (0.95 to 3.15)      | <.0001         |
| Clinical Officer                                     | 2.38 (1.90 to 2.86)      | <.0001         |
| Nurse - Clinical Officer                             | -0.33 (-1.53 to 0.87)    | 0.5886         |

Model parameter estimates based on piecewise linear mixed-effect models with random intercept and slopes and a knot placed at 3 months. Three DBP observations > 150 were removed.
