# Supplementary material for: Effect of Nurse-Based Management of Hypertension in Rural Western Kenya
Source: PubMed Central journal article supplement (PMC7716784; doi:10.5334/gh.856), 2020-12-01
Supplement: gh-15-1-856-s5.pdf [file gh-15-1-856-s5.pdf]

# Hypertension screening and care algorithm

## Dispensary care algorithm:

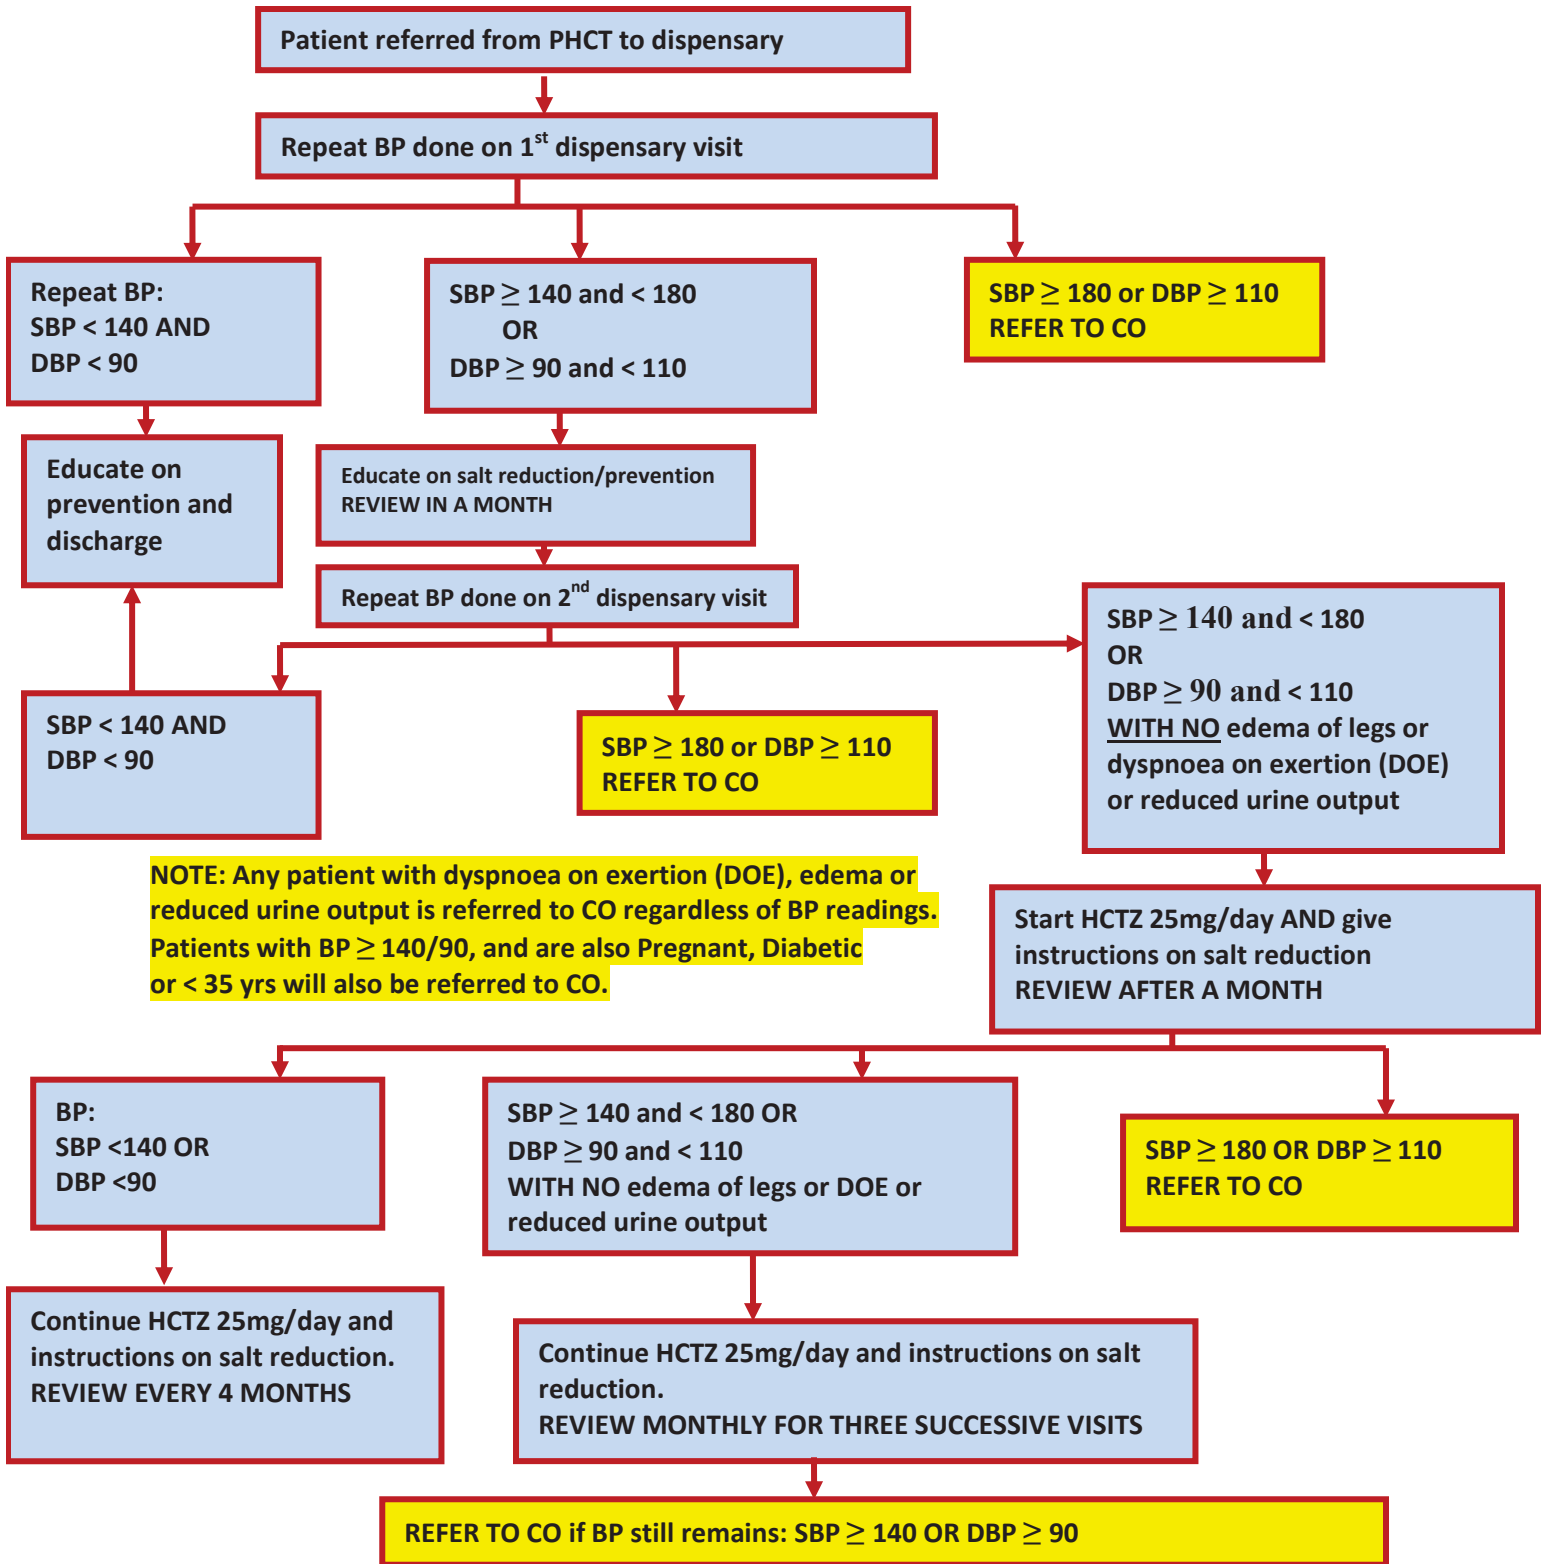

# Management of hypertension in diabetes

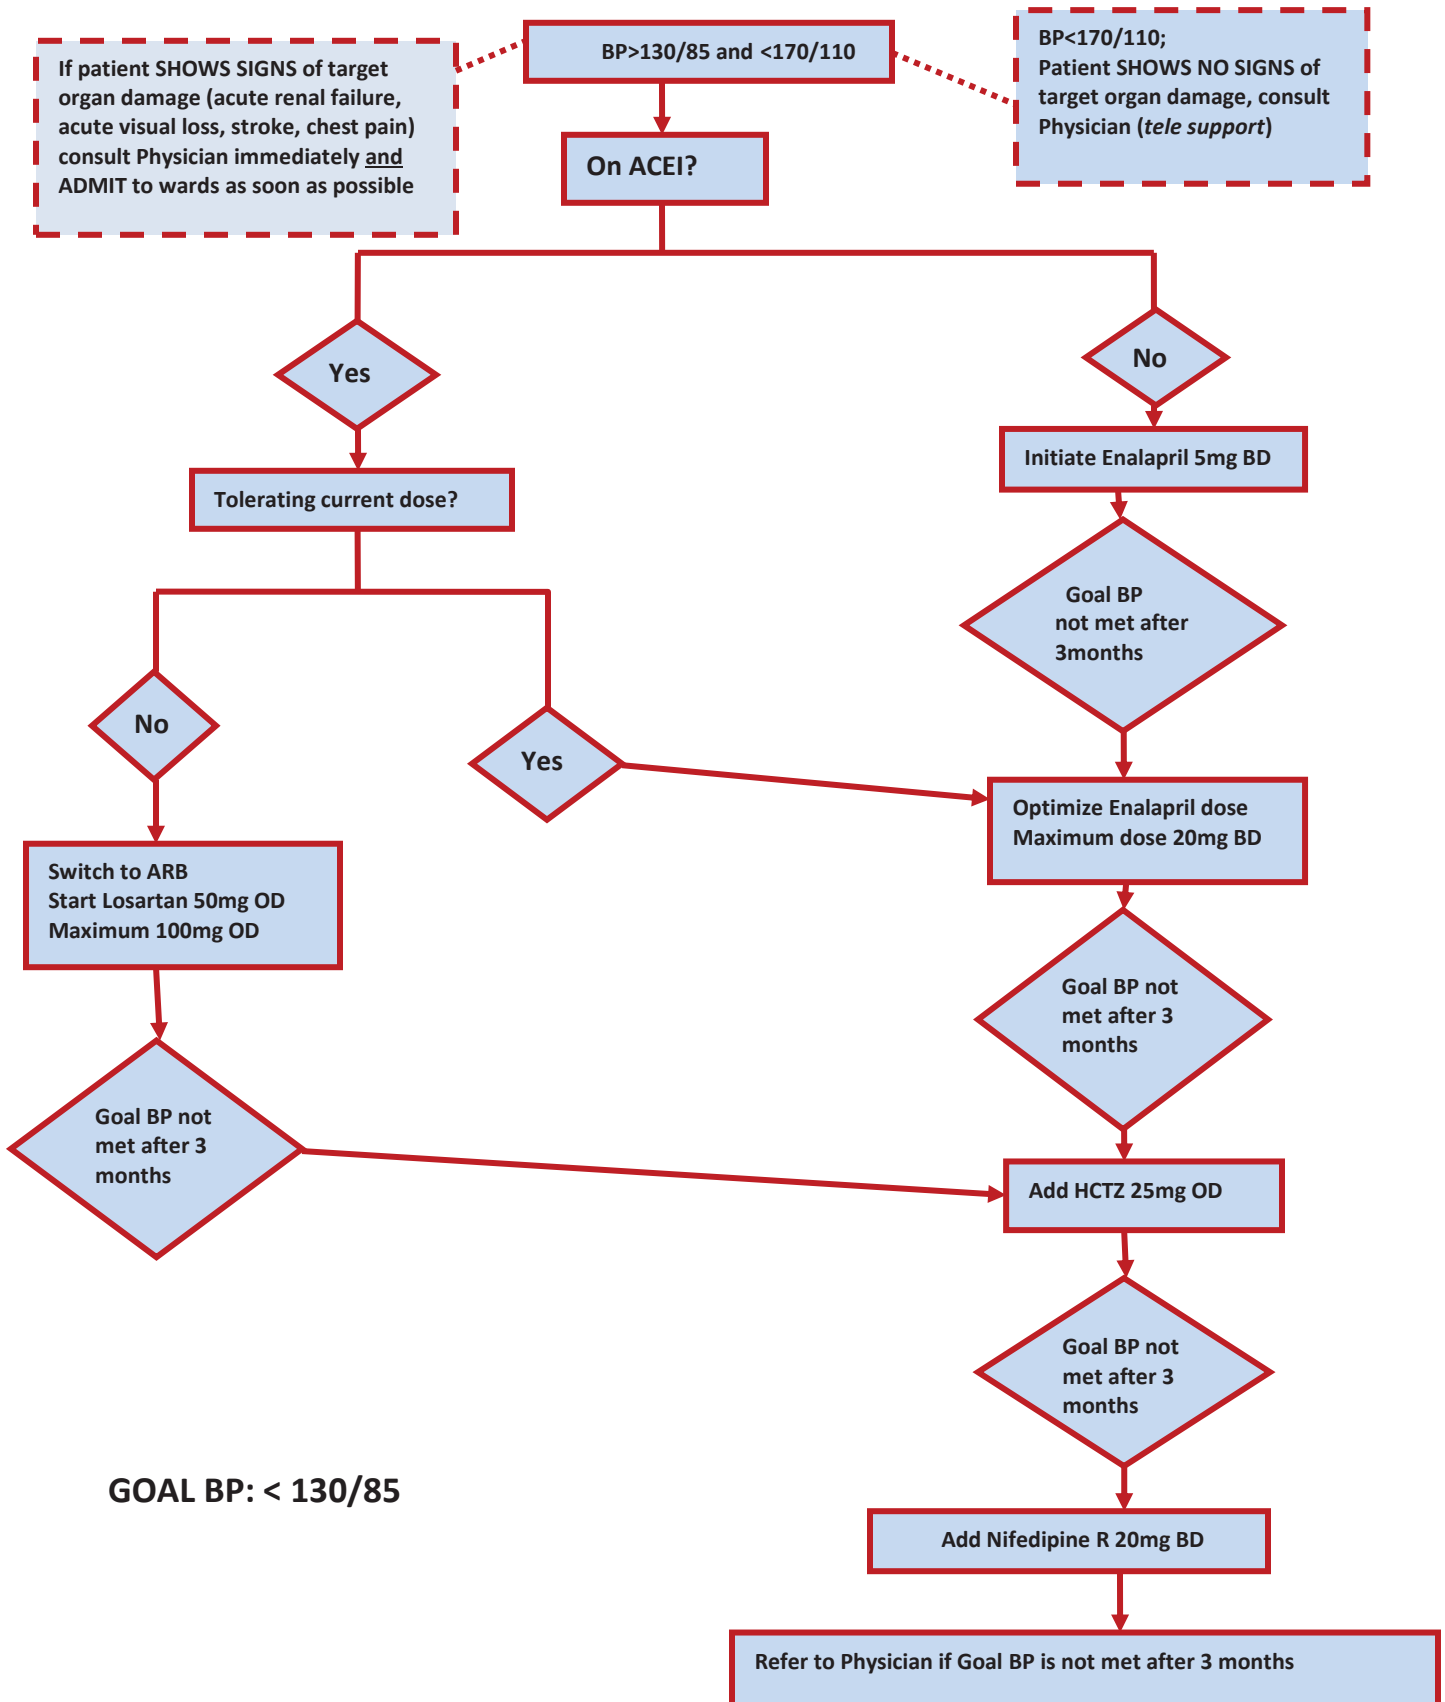

**PRICES FOR TESTS AND MEDICINES IN AMPATH CDM PROGRAM**

| <b>Test</b>               | <b>Price per test (KShs)</b>   |
|---------------------------|--------------------------------|
| Creatinine                | 300                            |
| Hemoglobin A1C            | 700                            |
| Random blood sugar        | 150                            |
| Urinalysis                | 100                            |
| Blood pressure check      | Free                           |
| <b>Medicine</b>           | <b>Price per tablet (KShs)</b> |
| Amlodipine 5 mg           | 5                              |
| Aspirin 75 mg             | 2                              |
| Atenolol 50 mg            | 2                              |
| Atorvastatin 20mg         | 7                              |
| Carvedilol 6.25 mg        | 5                              |
| Digoxin 0.25mg            | 7                              |
| Enalapril 10mg            | 5                              |
| Enalapril 5mg             | 2                              |
| Furosemide 40 mg          | 1                              |
| Glibenclamide 5 mg        | 2                              |
| Hydralazine 25 mg         | 3                              |
| Hydrochlorothiazide 50 mg | 1                              |
| Losartan 50mg             | 5                              |
| Metformin 500 mg          | 2                              |
| Metformin 850 mg          | 3                              |
| Nifedipine retard 20 mg   | 1                              |
| Propranolol 40 mg         | 1                              |
| Spironolactone 25mg       | 5                              |
